# Supplementary material for: Self-assembling nanoparticles encapsulating zoledronic acid revert multidrug resistance in cancer cells
Source: PubMed Central journal article supplement (PMC4741618; doi:10.18632/oncotarget.5058), 2015-09-09
Supplement: oncotarget-06-31461-s001.pdf [file oncotarget-06-31461-s001.pdf]

## SUPPLEMENTARY FIGURES AND TABLES

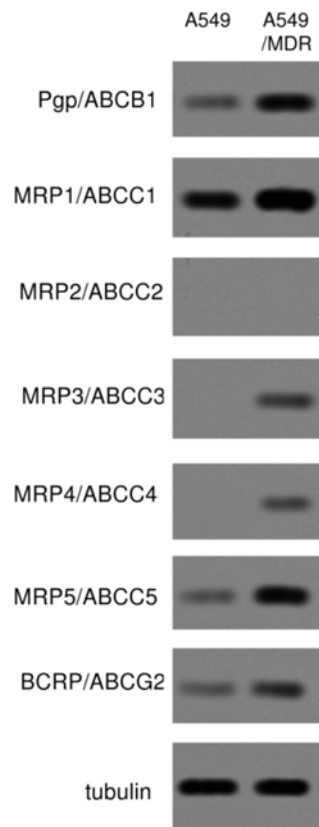

**Supplementary Figure S1: Expression of ABC transporters in chemosensitive and MDR cancer cells.** Chemosensitive human lung cancer A549 cells and their resistant counterpart A549/MDR cells were lysed and subjected to the Western blot analysis for Pgp/ABCB1, MRP1/ABCC1, MRP2/ABCC2, MRP3/ABCC3, MRP4/ABCC4, MRP5/ABCC5, BCRP/ABCG2. The  $\beta$ -tubulin expression was used as control of equal protein loading. The figure is representative of 3 experiments.

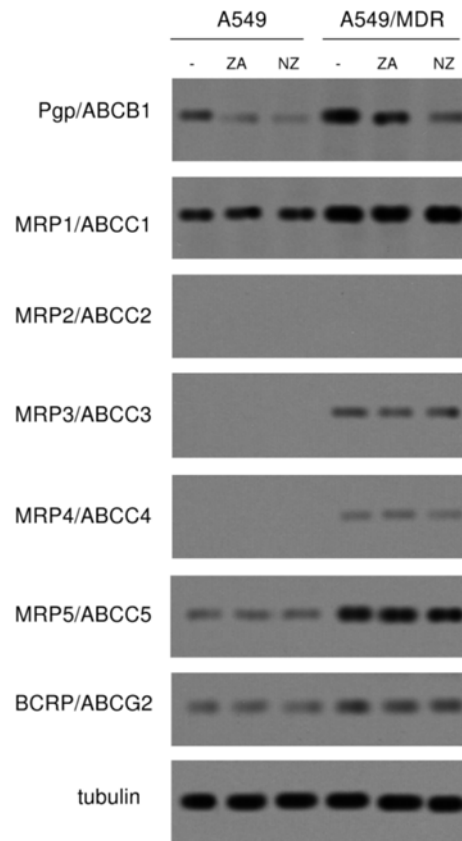

**Supplementary Figure S2: Expression of ABC transporters after treatment with ZA and NZ in chemosensitive and MDR cancer cells.** Chemosensitive human lung cancer A549 cells and their resistant counterpart A549/MDR cells were cultured for 48 h in fresh medium (-), in medium containing 1  $\mu$ M zoledronic acid (ZA) or 1  $\mu$ M self-assembling ZA formulation (NZ), then lysed and subjected to the Western blot analysis for Pgp/ABCB1, MRP1/ABCC1, MRP2/ABCC2, MRP3/ABCC3, MRP4/ABCC4, MRP5/ABCC5, BCRP/ABCG2. The  $\beta$ -tubulin expression was used as control of equal protein loading. The figure is representative of 3 experiments.

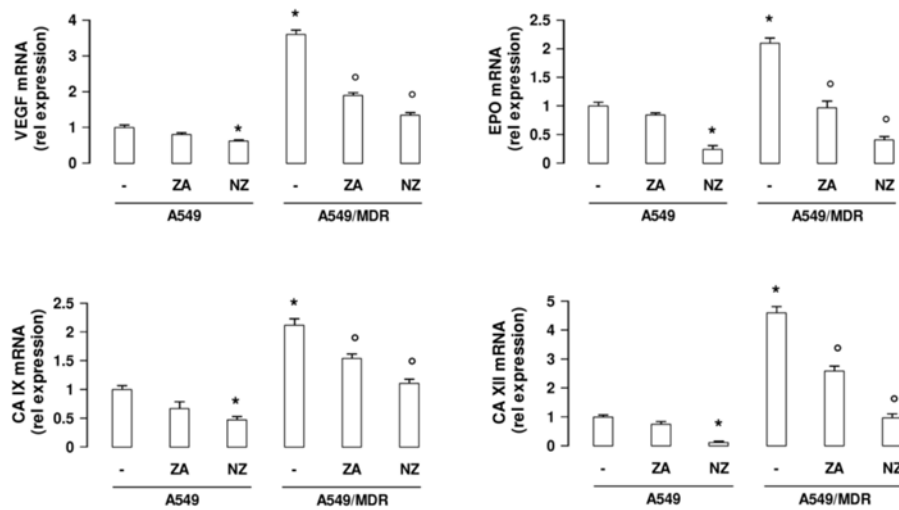

**Supplementary Figure S3: Expression of HIF-1 $\alpha$ -target genes in chemosensitive and MDR cancer cells treated with ZA and NZ.** Chemosensitive human lung cancer A549 cells and their resistant counterpart A549/MDR cells were cultured for 48 h in fresh medium (-), in medium containing 1  $\mu$ M zoledronic acid (ZA) or 1  $\mu$ M self-assembling ZA formulation (NZ). *VEGF*, *EPO*, *CA IX*, *CA XII* mRNA levels were detected in triplicate by qRT-PCR. Data are presented as means  $\pm$  SD ( $n = 4$ ). For all panels, versus untreated A549 cells: \* $p < 0.05$ ; versus untreated A549/MDR cells: ° $p < 0.02$ .

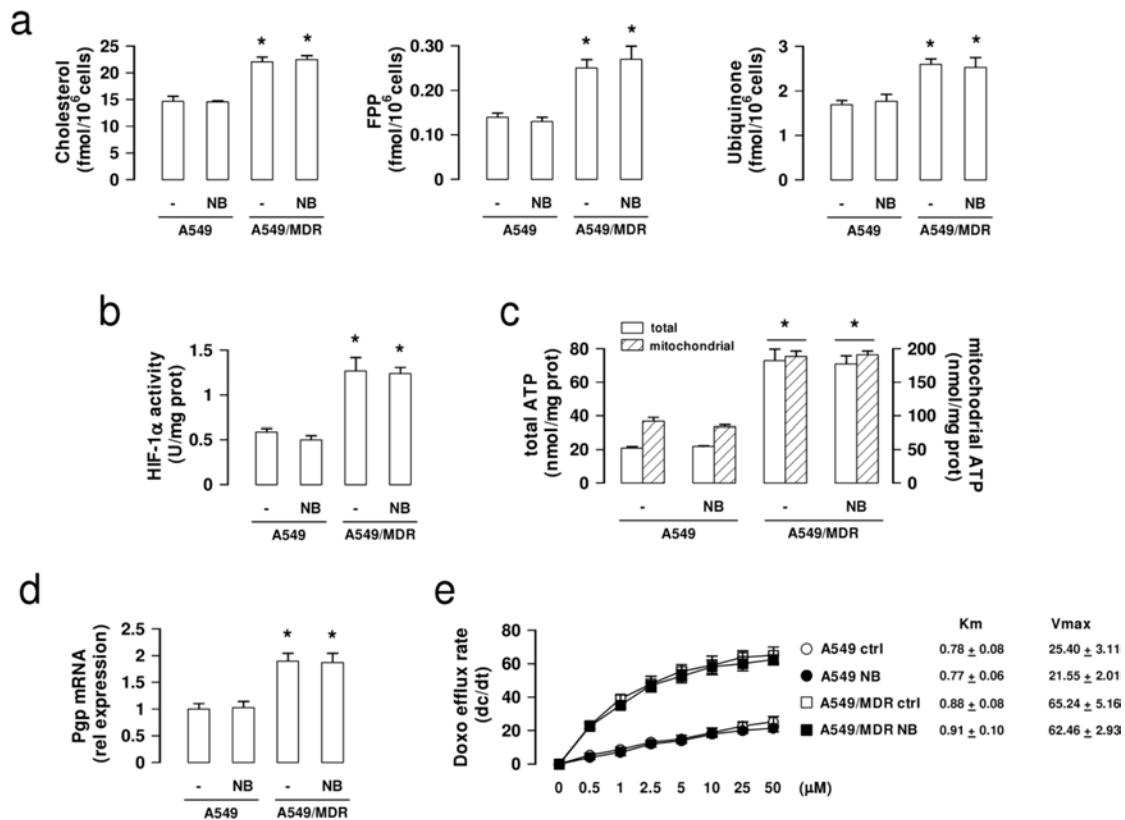

**Supplementary Figure S4: Effects of empty self assembling liposomes on chemosensitive and MDR cancer cells.** Chemosensitive human lung cancer A549 cells and their resistant counterpart A549/MDR cells were cultured for 48 h in fresh medium (-) or in medium containing self-assembling formulation without zoledronic acid (blank NPs, NB) at the same final concentration used in the all the other experimental assays. **a.** Cells were radiolabelled during the last 24 h with [<sup>3</sup>H]-acetate, then the *de novo* synthesis of cholesterol, FPP and ubiquinone was measured. Data are presented as means  $\pm$  SD ( $n = 3$ ). For all panels, A549/MDR cells versus A549 cells:  $*p < 0.02$ . **b.** HIF-1 $\alpha$  activity was measured in nuclear extracts by ELISA. Data are presented as means  $\pm$  SD ( $n = 3$ ). A549/MDR cells versus A549 cells:  $*p < 0.005$ . **c.** ATP levels in whole cell (total) and isolated mitochondria (mitochondrial) were measured by a chemiluminescence-based assay. Data are presented as means  $\pm$  SD ( $n = 3$ ). A549/MDR cells versus A549 cells:  $*p < 0.001$ . **d.** *Pgp* mRNA levels were detected in triplicate by qRT-PCR. Data are presented as means  $\pm$  SD ( $n = 3$ ). A549/MDR cells versus A549 cells:  $*p < 0.001$ . **e.** Cells were grown for 48 h in fresh medium or in medium containing blank NPs (NB), then incubated for 20 min with increasing concentrations (0–50  $\mu$ M/L) of doxorubicin (dox). Cells were washed and tested for the intracellular drugs content. The procedure was repeated on a second series of dishes, incubated in the same experimental conditions and analyzed after 10 min. Data are presented as means  $\pm$  SD ( $n = 3$ ). The rate of doxorubicin efflux (dc/dt) was plotted versus the initial concentration of the drug. Vmax (nmol/min/mg proteins) and Km (nmol/mg proteins) were calculated with the Enzfitter software.

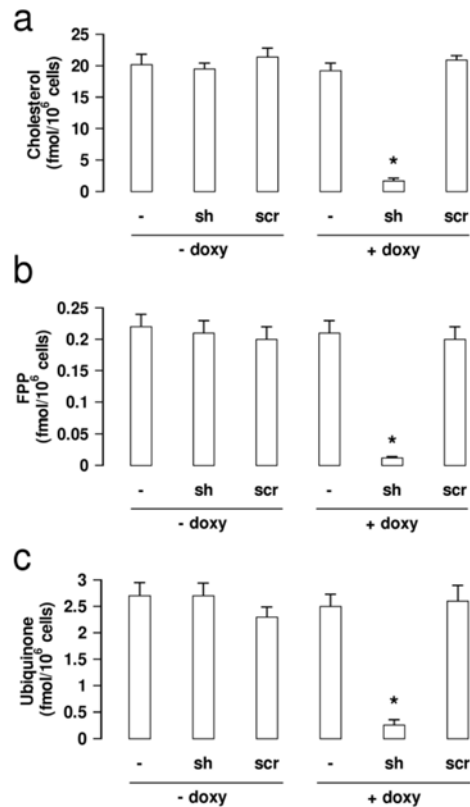

**Supplementary Figure S5: Effects of FPPS silencing on the synthesis of cholesterol, FPP and ubiquinone in chemoresistant cancer cells.** Wild-type A549/MDR cells, cells treated with a TetON vector containing a shRNA targeting *FPPS* (sh) or with a non targeting shRNA vector (scr), were cultured 48 h in media without (- doxy) or with (+ doxy) 1  $\mu$ g/ml doxycycline. Cells were radiolabelled during the last 24 h with [<sup>3</sup>H]-acetate, then the *de novo* synthesis of cholesterol (panel a), FPP (panel b) or ubiquinone (panel c) was measured. Data are presented as means  $\pm$  SD ( $n = 3$ ). For all panels, versus untreated (-, - doxy) cells: \* $p < 0.001$ .

**Supplementary Table S1: IC50 ( $\mu\text{M}$ ) of different cytotoxic drugs in HT29 and HT29/MDR cells**

| Drug                   | Transporter                       | HT29             | HT29              | HT29              | HT29/MDR                      | HT29/MDR          | HT29/MDR          |
|------------------------|-----------------------------------|------------------|-------------------|-------------------|-------------------------------|-------------------|-------------------|
|                        |                                   | CTRL             | ZA                | NZ                | CTRL                          | ZA                | NZ                |
| <b>doxorubicin</b>     | Pgp, MRP1, MRP2, MRP3, BCRP       | 1.23 $\pm$ 0.08  | 0.91 $\pm$ 0.07   | 0.71 $\pm$ 0.1 *  | 2.58 $\pm$ 0.13 <sup>°</sup>  | 1.02 $\pm$ 0.12 * | 0.98 $\pm$ 0.07*  |
| <b>vinblastine</b>     | Pgp, MRP1, MRP2                   | 3.61 $\pm$ 0.14  | 2.53 $\pm$ 0.17   | 1.88 $\pm$ 0.14 * | 9.23 $\pm$ 0.41 <sup>°</sup>  | 3.21 $\pm$ 0.16 * | 0.51 $\pm$ 0.09*  |
| <b>etoposide</b>       | Pgp, MRP1, MRP2, MRP3             | 1.12 $\pm$ 0.15  | 0.67 $\pm$ 0.11 * | 0.51 $\pm$ 0.06 * | 11.41 $\pm$ 0.37 <sup>°</sup> | 2.76 $\pm$ 0.44 * | 2.33 $\pm$ 0.18*  |
| <b>irinotecan</b>      | Pgp, MRP1, MRP2                   | 6.23 $\pm$ 0.37  | 4.41 $\pm$ 0.31   | 3.71 $\pm$ 0.44 * | 47.11 $\pm$ 5.14 <sup>°</sup> | 36.11 $\pm$ 3.71  | 14.23 $\pm$ 0.91* |
| <b>cisplatin</b>       | MRP1, MRP2, MRP4                  | 10.89 $\pm$ 1.21 | 7.21 $\pm$ 0.88   | 6.01 $\pm$ 0.13 * | 52.14 $\pm$ 2.47 <sup>°</sup> | 5.88 $\pm$ 0.42 * | 2.24 $\pm$ 0.55*  |
| <b>oxaliplatin</b>     | MRP1, MRP4                        | 5.87 $\pm$ 0.61  | 2.43 $\pm$ 0.52 * | 0.91 $\pm$ 0.15 * | 12.21 $\pm$ 0.18 <sup>°</sup> | 5.21 $\pm$ 0.23 * | 0.81 $\pm$ 0.16*  |
| <b>5-fluorouracile</b> | MRP1, MRP3, MRP4, MRP5            | 0.83 $\pm$ 0.11  | 0.61 $\pm$ 0.14   | 0.65 $\pm$ 0.13   | 7.53 $\pm$ 0.71 <sup>°</sup>  | 5.44 $\pm$ 0.23   | 3.12 $\pm$ 0.14*  |
| <b>methotrexate</b>    | MRP4, Pgp, MRP1, MRP2, MRP3, BCRP | 2.34 $\pm$ 0.31  | 1.01 $\pm$ 0.18 * | 0.21 $\pm$ 0.09 * | 8.79 $\pm$ 0.71 <sup>°</sup>  | 1.77 $\pm$ 0.45 * | 0.46 $\pm$ 0.22*  |
| <b>pemetrexed</b>      | MRP5                              | 0.74 $\pm$ 0.01  | 0.65 $\pm$ 0.17   | 0.12 $\pm$ 0.07 * | 8.26 $\pm$ 0.57 <sup>°</sup>  | 5.78 $\pm$ 0.56   | 1.33 $\pm$ 0.27*  |
| <b>gemcitabine</b>     | MRP5                              | 0.11 $\pm$ 0.03  | 0.11 $\pm$ 0.09   | 0.06 $\pm$ 0.01 * | 0.75 $\pm$ 0.08 <sup>°</sup>  | 0.21 $\pm$ 0.09 * | 0.05 $\pm$ 0.02*  |
| <b>mitoxantrone</b>    | BCRP, Pgp, MRP1                   | 5.88 $\pm$ 0.41  | 2.21 $\pm$ 0.17 * | 2.03 $\pm$ 0.21 * | 9.67 $\pm$ 0.41 <sup>°</sup>  | 4.53 $\pm$ 0.37 * | 2.81 $\pm$ 0.41*  |

Untreated (CTRL) HT29 and HT29/MDR cells, cells treated with ZA or NZ (1  $\mu\text{M}$ ), were incubated for 72 h with increasing concentrations of cytotoxic drugs, then stained in quadruplicate with neutral red ( $n = 3$ ). Versus respective CTRL: \* $p < 0.05$ ; HT29/MDR versus HT29 cells: <sup>°</sup> $p < 0.001$ .

**Supplementary Table S2: Hematochemical parameters of animals**

|          |        | LDH         | AST      | ALT     | AP      | CPK        | creatinine   |
|----------|--------|-------------|----------|---------|---------|------------|--------------|
|          |        | (U/l)       | (U/l)    | (U/l)   | (U/l)   | (U/l)      | (mg/l)       |
| A549     | Ctrl   | 6342 ± 1567 | 267 ± 56 | 39 ± 12 | 75 ± 16 | 434 ± 68   | 0.05 ± 0.01  |
|          | NZ     | 6872 ± 1812 | 293 ± 24 | 46 ± 11 | 87 ± 24 | 511 ± 76   | 0.06 ± 0.02  |
|          | dox    | 7862 ± 2089 | 254 ± 34 | 41 ± 13 | 81 ± 23 | 897 ± 71*  | 0.05 ± 0.02  |
|          | NZ+dox | 6723 ± 1629 | 309 ± 31 | 50 ± 22 | 73 ± 27 | 911 ± 56*  | 0.06 ± 0.03  |
|          | Pt     | 6341 ± 1098 | 311 ± 24 | 45 ± 17 | 76 ± 23 | 467 ± 71   | 0.09 ± 0.01* |
|          | NZ+Pt  | 6009 ± 1987 | 298 ± 66 | 49 ± 17 | 75 ± 11 | 509 ± 87   | 0.10 ± 0.02* |
| A549/MDR | Ctrl   | 7098 ± 1803 | 288 ± 24 | 47 ± 18 | 78 ± 26 | 454 ± 91   | 0.04 ± 0.02  |
|          | NZ     | 7612 ± 2137 | 291 ± 34 | 51 ± 16 | 87 ± 21 | 459 ± 37   | 0.06 ± 0.02  |
|          | dox    | 6534 ± 1271 | 254 ± 71 | 45 ± 16 | 80 ± 14 | 434 ± 68   | 0.04 ± 0.01  |
|          | NZ+dox | 6093 ± 1234 | 312 ± 45 | 55 ± 23 | 80 ± 20 | 987 ± 99 * | 0.05 ± 0.04  |
|          | Pt     | 6092 ± 1261 | 324 ± 71 | 56 ± 25 | 77 ± 23 | 467 ± 93   | 0.08 ± 0.01* |
|          | NZ+Pt  | 6873 ± 1093 | 321 ± 81 | 47 ± 16 | 71 ± 34 | 489 ± 88   | 0.09 ± 0.02* |

Six weeks old female BALB/c mice bearing a 100 mm<sup>3</sup>-tumor of A549 or A549/MDR cells were randomly divided in the following groups (5 mice/group) and treated with saline solution (Ctrl), NZ, doxorubicin (dox), NZ + doxorubicin (NZ+dox), carboplatin (Pt), NZ + carboplatin (NZ + Pt), as detailed under Materials and Methods. The experiment was repeated 2 times. The animals were sacrificed at day 21 after randomization. Blood was collected immediately after mice euthanasia. Versus Ctrl group: \* $p < 0.02$ .

**Supplementary Table S3: Primers sequence for qRT-PCR**

| Gene          | Forward primer         | Reverse primer         |
|---------------|------------------------|------------------------|
| <i>GLUT1</i>  | CCTGCAGTTTGGCTACAACA   | TAACGAAAAGGCCACAGAG    |
| <i>HK</i>     | AGACGCACCCACAGTATTCC   | CGCATCCTCTTCTCACCTC    |
| <i>PFK1</i>   | GGAGCTTCGAGAACAACCTGG  | CTGTGTGTCCATGGGAGATG   |
| <i>ALDO-A</i> | GCTATGGCCTTTTCCTTTCC   | ATGCTCCCAGTGGACTCATC   |
| <i>GAPDH</i>  | GAAGGTGAAGGTCGGAGT     | CATGGTGAATCATATTGGAA   |
| <i>PGK</i>    | TTCATGGATGAGGTGGTGA    | CTTCCAGGAGCTCCAACTG    |
| <i>ENO-A</i>  | GCTCCGGGACAATGATAAGA   | TCCATCCATCTCGATCATCA   |
| <i>PK</i>     | TGCAGTGGAGCTCAGAGAGA   | GCTTCCGGTGACATAATGCT   |
| <i>LDH</i>    | TGGGAGTTCACCCATTAAGC   | AGCACTCTCAACCACCTGCT   |
| <i>VEGF</i>   | ATCTTCAAGCCATCCTGTGTGC | GCTCACCGCCTCGGCTTGT    |
| <i>EPO</i>    | CAGACTTCTACGGCCTGCTG   | GCTGAACACTGCAGCTTGAA   |
| <i>CA IX</i>  | GTCTCGCTTGGAAAGAAATCG  | AGAGGGTGTGGAGCTGCTTA   |
| <i>CA XII</i> | ACTGAGTCTCTGGGCATCATCC | AAAAGCCAAATGGACACCAC   |
| <i>Pgp</i>    | TGCTGGAGCGGTTCTACG     | ATAGGCAATGTTCTCAGCAATG |
| <i>S14</i>    | GGTGCAAGGAGCTGGGTAT    | TCCAGGGGTCTTGGTCCTATTT |
